# Supplementary material
Source: MDPI journal article supplement (https://www.mdpi.com/2076-3417/12/12/5902)
Supplement: s1 [file s1]

# Supplementary Materials: Advanced Analysis of 3D Kinect Data: Supervised Classification of Facial Nerve Function via Parallel Convolutional Neural Networks

Mohsen Shayestegan <sup>1</sup>, Jan Kohout <sup>2</sup>, Karel Štícha <sup>2</sup> and Jan Mareš <sup>1,2,\*</sup>

## Supplementary Material

**Table S1.** F1-Score of TPCNN.

| HB by a Clinician | Val set 1<br>[%] | Val set 2<br>[%] | Val set 3<br>[%] | Val set 4<br>[%] | Val set 5<br>[%] |
|-------------------|------------------|------------------|------------------|------------------|------------------|
| 1                 | 89.07            | 87.87            | 89.43            | 86.82            | 88.37            |
| 2                 | 86.95            | 75.00            | 80.00            | 85.71            | 78.26            |
| 3                 | 84.44            | 76.92            | 79.06            | 79.99            | 88.37            |
| 4                 | 71.42            | 85.71            | 92.30            | 92.30            | 76.92            |
| 5                 | 85.71            | 83.33            | 100.00           | 83.33            | 72.72            |
| 6                 | 93.75            | 78.78            | 75.67            | 62.06            | 71.42            |

**Table S2.** F1-Score of CNN-LSTM.

| HB by a Clinician | Val set 1<br>[%] | Val set 2<br>[%] | Val set 3<br>[%] | Val set 4<br>[%] | Val set 5<br>[%] |
|-------------------|------------------|------------------|------------------|------------------|------------------|
| 1                 | 0                | 88.28            | 75.43            | 84               | 78.84            |
| 2                 | 16.94            | 70.83            | 64               | 69.38            | 72               |
| 3                 | 21.27            | 80.95            | 78.94            | 81.81            | 77.55            |
| 4                 | 40               | 82.35            | 75               | 76.92            | 55.55            |
| 5                 | 38.36            | 66.66            | 66.66            | 83.33            | 53.33            |
| 6                 | 39.21            | 64.70            | 64.70            | 48.48            | 58.82            |

**Table S3.** F1-Score of ResNet.

| HB by a Clinician | Val set 1<br>[%] | Val set 2<br>[%] | Val set 3<br>[%] | Val set 4<br>[%] | Val set 5<br>[%] |
|-------------------|------------------|------------------|------------------|------------------|------------------|
| 1                 | 0                | 0                | 0                | 0                | 0                |
| 2                 | 24.24            | 29.41            | 29.16            | 18.75            | 18.75            |
| 3                 | 31.57            | 41.66            | 38.29            | 32.43            | 32.43            |
| 4                 | 48               | 26.41            | 24.24            | 19.60            | 19.60            |
| 5                 | 20.40            | 50               | 32.43            | 16.66            | 16.66            |
| 6                 | 36.36            | 26.41            | 37.20            | 28.57            | 28.57            |

**Table S4.** F1-Score of LSTM.

| HB by a Clinician | Val set 1<br>[%] | Val set 2<br>[%] | Val set 3<br>[%] | Val set 4<br>[%] | Val set 5<br>[%] |
|-------------------|------------------|------------------|------------------|------------------|------------------|
| 1                 | 0                | 0                | 0                | 0                | 0                |
| 2                 | 0                | 21.42            | 25               | 0                | 20.68            |
| 3                 | 7.40             | 22.22            | 25               | 0                | 18.18            |
| 4                 | 18.46            | 21.87            | 30               | 13.33            | 16               |
| 5                 | 18.18            | 11.11            | 24.99            | 14.81            | 14.28            |
| 6                 | 25.53            | 26.41            | 28.57            | 20.68            | 25               |

**Table S5.** F1-Score of FCN.

| HB by a Clinician | Val set 1<br>[%] | Val set 2<br>[%] | Val set 3<br>[%] | Val set 4<br>[%] | Val set 5<br>[%] |
|-------------------|------------------|------------------|------------------|------------------|------------------|
| 1                 | 0                | 0                | 0                | 0                | 0                |
| 2                 | 6                | 0                | 15.38            | 7.14             | 6.8              |
| 3                 | 7.40             | 0                | 7.14             | 20.33            | 11.42            |
| 4                 | 22.72            | 0                | 16.66            | 15.62            | 22.22            |
| 5                 | 11.94            | 11.11            | 14.63            | 20               | 9.63             |
| 6                 | 22.22            | 22.85            | 20.68            | 14.81            | 23.52            |
